# Supplementary material for: Biomimetic dual-responsive bioengineered nanotheranostics for intracellular cascade-synthesizing chemo-drugs and efficient oncotherapy
Source: Royal Society of Chemistry journal article supplement (doi:10.1039/d2tb01943d), 2022-11-29
Supplement: d2tb01943d1.pdf [file d2tb01943d1.pdf]

## 1 *Supporting Information*

### 2 **Biomimetic Dual-Responsive Bioengineered Nanotheranostics for Intracellular** 3 **Cascade-Synthesizing Chemo-Drugs and Efficient Oncotherapy**

4 Xin Zhang<sup>1,a</sup>, Xinglin Zhu<sup>1,a</sup>, Yuan He<sup>1,c</sup>, Ying Zhang<sup>\*,d</sup>, Shan Huang<sup>e</sup>, Xue Yif, Ying  
5 Li<sup>\*,e</sup>, Zhenqing Hou<sup>\*,a</sup> , Zhongxiong Fan<sup>\*,a,b</sup> 

6 <sup>a</sup> College of Materials, Xiamen University, Xiamen, 361005, China.

7 <sup>b</sup> Institute of Materia Medica & College of Life Science and Technology, Xinjiang  
8 University, Urumqi, 830017, China.

9 <sup>c</sup> Department of Cardiothoracic Surgery, the Affiliated Dongnan Hospital of Xiamen  
10 University, Zhangzhou, 363005, China.

11 <sup>d</sup> Department of Radiology, Shandong First Medical University & Shandong  
12 Academy of Medical Sciences, Taian, 271016, China.

13 <sup>e</sup> Xiamen Key Laboratory of Traditional Chinese Bio-engineering, Xiamen Medical  
14 College, Xiamen, 361021, China.

15 <sup>f</sup> Institute of Respiratory Diseases, Xiamen Medical College, Xiamen, 361021, China

16 <sup>1</sup>X. Zhang, X. Zhu, and Y. He contributed equally to this work.

17 **\*Corresponding authors:** Prof. Ying Zhang, yzhang@sdfmu.edu.cn; Dr. Ying Li,  
18 yinn.lee@163.com; Prof. Zhenqing Hou, houzhenqing@xmu.edu.cn; Dr. Zhongxiong  
19 Fan, fanzhongxiong@xju.edu.cn

20  **ORCID:** Zhenqing Hou: 0000-0002-5537-075X; Zhongxiong Fan: 0000-0001-  
21 5751-9530

## 22 **1. Materials and methods**

### 23 **1.1. Materials**

24 Indocyanine green (ICG) was purchased from Haoyun Chemical Technology Co,  
25 Ltd. 1,5-dihydroxynaphthalene (1,5-DHN) was obtained from Aladdin. 5-hydroxy  
26 1,4-naphthoquinone was bought from Bidpharm. Anhydrous methanol and  
27 Tetrahydrofuran (THF) were provided from Sinopharm Chemical Reagent Co., Ltd  
28 (Shanghai, China). Calcein-acetoxymethyl ester (Calcein AM)/propidium iodide (PI)  
29 double staining reagent was provided by KeyGEN BioTECH. Annexin V-FITC

1 apoptosis detection kit, 4, 6-diamidino-2-phenylindole (DAPI), 2, 7-  
2 dichlorofluorescein diacetate (DCFH-DA), and 3-[4,5-dimethylthiazol-2-yl]-2,5-  
3 diphenyltetrazolium bromide (MTT) were purchased from Beyotime. Dulbecco's  
4 modified eagle's medium (DMEM), roswell park memorial institute (RPMI) 1640,  
5 fetal bovine serum (FBS), singlet oxygen sensor green (SOSG), penicillin-  
6 streptomycin, and trypsin were supplied by Thermo Fisher Scientific. Dulbecco's  
7 phosphate-buffered saline (PBS) purchased from Servicebio. 4T1 cells were supplied  
8 by American Type Culture Collection (ATCC). BALB/c nude mice were provided by  
9 Xiamen University Laboratory Animal Center. All animal procedures were complied  
10 with the guidelines of the Xiamen University Institutional Animal Care and Use  
11 Committee.

## 12 **1.2. Cell culture**

13 4T1 cells were provided from the cell bank of Chinese Academy of Sciences and  
14 cultured in DMEM supplemented with 10% of FBS and 1% of penicillin/streptomycin  
15 at 37 °C and 5% of CO<sub>2</sub> until the stationary phase of growth was realized.

## 16 **1.3. Animals and their tumor models**

17 BALB/c mice were obtained from the Laboratory Animal Center of Xiamen  
18 University. All animal experiments were carried out based on a protocol approved *via*  
19 the Institutional Animal Care and Use Committee of Xiamen University, and the  
20 assigned approval/accreditation number is XMU-LAC20170109. 4T1 tumor BALB/c  
21 mice were built via subcutaneously inoculating  $5 \times 10^6$  4T1 cells on both the right  
22 lower limb of each mouse.

## 23 **1.4. Construction of ICG-DHN**

24 ICG-DHN was fabricated by a simple supramolecular co-assembly method  
25 between ICG and DHN. Briefly, a methanol solution of ICG (200  $\mu$ L and 2 mg/mL)  
26 was mixture with a THF solution of DHN (400  $\mu$ L and 2 mg/mL). After stir in the  
27 dark environment for 2 h at 25 °C, the mixed organic solutions containing ICG and  
28 DHN were injected dropwise into 4 mL of deionized (DI) water and then stirred  
29 overnight in the dark environment at 25 °C. Next, the crude product was dialyzed *via*  
30 DI water for 12 h (molecular weight cut off (MWCO) = 1,000 DA, Slide-A-Lyzer,  
31 Thermo Scientific, USA) and meanwhile DI water was replaced every 2 h. ICG-DHN  
32 was formed by co-assembly of ICG and DHN. Lastly, the resultant ICG-DHN was  
33 stored at 4 °C environment for future application.

34

## 1    **1.5. Characterization of ICG-DHN**

2       Molecular docking was performed on the AutoDock Vina program  
3 (<http://cloud.yinfo tek.com>). Fourier transform infrared (FT-IR) spectroscopy was  
4 performed on a Bruker IFS-55 infrared spectrometer (Bruker, Zurich, Switzerland).  
5 Ultraviolet-visible (UV-vis) absorbance was conducted on the Shimadzu UV  
6 spectrophotometer (UV-2550/2450, Shimadzu, Japan). The morphology was observed  
7 with the transmission electron microscope (TEM, JEM 2100, JEOL, Tokyo, Japan) at  
8 200 kV. Hydrodynamic diameter and polydispersity index (PDI) were determined *via*  
9 dynamic light scattering (DLS) by a Malvern Zetasizer Nano-ZS (Malvern  
10 Instruments, Worcestershire, U.K.). Zeta potential was determined by electrophoretic  
11 light scattering (ELS) using the same equipment. Proton nuclear magnetic resonance  
12 (<sup>1</sup>H NMR) spectra were measured with the Bruker AV400 MHz NMR spectrometer  
13 (Bruker, Billerica, MA, USA). X-ray diffraction (XRD) spectra were obtained by the  
14 X-ray diffractometer (Phillips X 0 pert Pro Super, Panalytical, Almelo, Netherlands).

## 15    **1.6. Construction of red blood cell membranes (RBCs)-cloaked ICG-DHN**

16       RBCs@ICG-DHN was constructed by coating RBCs onto ICG-DHN surface *via*  
17 a multiple-step extrusion. In brief, the RBCs-derived vesicles were obtained by a  
18 well-established procedure and redispersed in PBS for further application<sup>1</sup>. After that,  
19 200  $\mu$ L of RBCs-derived vesicles (1 mg/mL) was added into the 3 mL of ICG-DHN  
20 dispersions (0.25 mg/mL). After sonication for 10 min at 4 °C and then extrusion  
21 through 0.80, 0.45, and 0.20  $\mu$ m polycarbonate porous membranes (Nuclepore Track-  
22 Etch Membrane Filter, USA). Next, the abovementioned dispersions were  
23 ultracentrifuged at 15000 rpm for 10 min at 4 °C, washed with cold PBS (1 $\times$ ). After  
24 that, the abovementioned dispersions were ultracentrifuged at 15000 rpm for 10 min  
25 at 4 °C and then redispersed in 10 mL of DI water *via* ultrasonication at 400 W at an  
26 ice bath for 5 min. The resultant RBCs@ICG-DHN dispersions were stored at 4 °C  
27 for further application.

## 28    **1.7. Characterization of RBCs@ICG-DHN**

29       Morphology was collected by TEM (JEM 2100, JEOL, Tokyo, Japan) at 200 kV.  
30 Hydrodynamic diameter and PDI were determined via DLS by a Malvern Zetasizer  
31 Nano-ZS (Malvern Instruments, Worcestershire, U.K.). Zeta potential was determined  
32 by ELS using the same equipment. UV-vis absorption was conducted on the  
33 Shimadzu UV spectrophotometer (UV-2550/2450, Shimadzu, Japan). Drug  
34 encapsulation efficiency and drug payload rate were measured by UV-vis absorption

1 and then calculated with the following equations: drug encapsulation efficiency (%) =  
2  $(\text{weight}_{\text{drug}} \text{ of encapsulation})/(\text{initial weight}_{\text{drug}})$ ; drug payload rate (%) =  $(\text{weight}_{\text{drug}}$   
3  $\text{ of encapsulation})/(\text{total weight of RBCs@ICG-DHN}) \times 100$ .

#### 4 **1.8. *In vitro* stability**

5 *In vitro* physiological stability of RBCs@ICG-DHN was estimated by diameter  
6 change at predesigned time intervals. Briefly, the diameter change of RBCs@ICG-  
7 DHN in DI water, PBS (pH 7.4), DMEM, and DMEM containing FBS was measured  
8 by DLS by a Malvern Zetasizer Nano-ZS (Malvern Instruments, Worcestershire, U.K.)  
9 at 0, 24, 48, 72, 96, and 120 h.

10 *In vitro* photostability of RBCs@ICG-DHN was evaluated by fluorescence  
11 intensity and UV-vis absorption changes at predesigned time intervals. In brief,  
12 changes in both fluorescence intensity and UV-vis absorption of RBCs@ICG-DHN  
13 were determined by the FluoroMax-4 Spectrofluorometer (HORIBA Jobin Yvon,  
14 USA) and the Shimadzu UV spectrophotometer (UV-2550/2450, Shimadzu, Japan) at  
15 0, 24, 48, 72, 96, and 120 h, respectively.

#### 16 **1.9. *In vitro* $^1\text{O}_2$ generation**

17 The  $^1\text{O}_2$  generation was determined by a commercial SOSG assay according to  
18 the manufacturer's suggested instruction. In a typical procedure, ICG and  
19 RBCs@ICG-DHN at the equivalent ICG concentration of 25  $\mu\text{g}/\text{mL}$  were mixed with  
20 10  $\mu\text{M}$  of SOSG, respectively. After 808 nm laser irradiation (100  $\text{mW}/\text{cm}^2$ ) for 0 s,  
21 50 s, 100 s, 150 s, 200 s, 250 s, and 300 s, the fluorescence intensity of SOSG from  
22 the abovementioned samples was determined by the FluoroMax-4 Spectrofluorometer  
23 (HORIBA Jobin Yvon, USA) at emission wavelength of 488 nm.

#### 24 **1.10. *In vitro* photooxidation**

25 *In vitro* photooxidation of RBCs@ICG-DHN was evaluated by UV-vis  
26 absorption changes at predesigned time points. In brief, 10 mL of DHN ( $10 \times 10^{-4}$  M)  
27 and 1 mL of RBCs@ICG-DHN (0.5  $\text{mg}/\text{mL}$ ) were added into a round bottom flask  
28 and then stirred until completely mixed. Next, after 808 nm laser irradiation (100  
29  $\text{mW}/\text{cm}^2$ ) for 30 min and these changes in UV-Vis absorption at 298 and 419 nm  
30 were measured by the Shimadzu UV spectrophotometer (UV-2550/2450, Shimadzu,  
31 Japan) at 5, 10, 15, 20, 25, and 30 min. After that, the decrease in absorbance at 298  
32 nm was employed to detect the depletion of DHN, whose concentration was  
33 calculated by the molar extinction coefficient ( $\epsilon = 7664 \text{ M}^{-1} \cdot \text{cm}^{-1}$ ). The increase in  
34 absorbance at 419 nm was used to detect the production of juglone, whose

1 concentration was calculated by the molar extinction coefficient ( $\epsilon = 3500 \text{ M}^{-1} \cdot \text{cm}^{-1}$ ).  
2 The final reaction yield is calculated by the ratio of the juglone production  
3 concentration and the initial DHN concentration.

#### 4 **1.11. *In vitro* drug release and disassembly**

5 *In vitro* release behaviors of DHN and ICG from RBCs@ICG-DHN were  
6 evaluated by various simulated physiological conditions. In a typical procedure, 3 mL  
7 of RBCs@ICG-DHN was transferred into a dialysis bag (MWCO = 1,000 DA, Slide-  
8 A-Lyzer, Thermo Scientific, USA) with/without 808 nm laser irradiation (100  
9 mW/cm<sup>2</sup> and 5 min), which was immersed into 20 mL of PBS at different pH values  
10 (7.4, 6.5, and 5.0). After that, 3 mL of the external PBS was withdrawn and then  
11 replaced with 3 mL of fresh PBS quickly based on the predesigned time points. Next,  
12 the release amount of DHN and ICG was measured by the Shimadzu UV  
13 spectrophotometer (UV-2550/2450, Shimadzu, Japan). Besides, the morphology  
14 changes of RBCs@ICG-DHN at pH 6.5 and 5.0 with 808 nm laser irradiation (100  
15 mW/cm<sup>2</sup> and 5 min) were observed by TEM.

#### 16 **1.12. *In vitro* cellular uptake**

17 *In vitro* cellular uptake of RBCs@ICG-DHN was evaluated by confocal laser  
18 scanning microscopy (CLSM) and flow cytometry analysis. In a typical procedure, for  
19 CLSM analysis, 4T1 cells were seeded into 6-well plates at a density of  $2.0 \times 10^5$   
20 cells/well and then incubated at 37°C for 24 h. After that, 4T1 cells were incubated  
21 with ICG, ICG-DHN, and RBCs@ICG-DHN at the equivalent ICG concentration of  
22 25  $\mu\text{g}/\text{mL}$  based on the predesigned incubation time points (1 h and 4 h) at 37 °C,  
23 respectively. Next, culture medium was removed. 4T1 cells were washed thrice by  
24 cold PBS and then fixed by 4% of paraformaldehyde for 30 min. Nuclei were stained  
25 using DAPI for 20 min. Finally, 4T1 cells were imaged by a Leica SP8-STED CLSM  
26 with excitation at 638 nm for ICG and 360 nm for DAPI.

27 For flow cytometry analysis, the previous steps were the same as the CLSM  
28 experiments that 4T1 cells were cultured with different formulations based on the  
29 predesigned incubation time points (1 h and 4 h) at 37 °C. After that, 4T1 cells were  
30 detached with trypsin/EDTA, suspended in PBS with 10% of FBS, centrifuged at 2,  
31 000 rpm for 5 min at 4 °C, and resuspended in fluorescence-activated cell sorting  
32 (FACS) buffer. Finally, the cellular fluorescence intensity of ICG was recorded by an  
33 Attune NXT ultrahigh speed flow cytometer (Thermo Scientific, USA) and then the  
34 experimental results were further analyzed by flowjo V10.

1     **1.13. Detection of termination of intracellular <sup>1</sup>O<sub>2</sub> generation**

2     Intracellular <sup>1</sup>O<sub>2</sub> generation of RBCs@ICG-DHN was estimated by CLSM and  
3 flow cytometry analysis. In brief, Intracellular generation of <sup>1</sup>O<sub>2</sub> in 4T1 cells was  
4 measured by using 2',7'-dichlorodihydrofluorescein diacetate (DCFH-DA). For  
5 CLSM analysis, 4T1 cells were seeded in 6-well plates at a density of 3.0 × 10<sup>5</sup>  
6 cells/well and incubated for 24 h. Next, culture medium was removed and then 4T1  
7 cells were washed thrice with cold PBS. In addition, 4T1 cells were incubated with  
8 ICG, ICG-DHN, and RBCs@ICG-DHN at equivalent ICG concentration (25 μg/mL)  
9 with 808 nm laser irradiation (100 mW/cm<sup>2</sup> and 5 min) for 8 h, respectively. Lastly,  
10 the supernatant was removed and then 4T1 cells were washed thrice with cold PBS.  
11 After incubation with DCFH-DA for 30 min, 4T1 cells were washed thrice by cold  
12 PBS and then fixed by 4% of paraformaldehyde for 30 min. Nuclei were stained by  
13 using DAPI for 20 min. Finally, 4T1 cells were imaged by a Leica SP8-STED CLSM  
14 with excitation at 488 nm for DCFH and 360 nm for DAPI.

15     For flow cytometry analysis, the previous steps were the same as the CLSM  
16 experiments that 4T1 cells were cultured with different formulations at 8 h at 37 °C.  
17 After that, 4T1 cells were detached with trypsin/EDTA, suspended in PBS with 10%  
18 of FBS, centrifuged at 2, 000 rpm for 5 min at 4 °C, and resuspended in FACS buffer.  
19 Finally, the cellular fluorescence intensity of DCFH was recorded by an Attune NXT  
20 ultrahigh speed flow cytometer (Thermo Scientific, USA) and then the experimental  
21 results were further analyzed by flowjo V10.

22     **1.14. *In vitro* cytotoxicity**

23     4T1 cells were seeded in 96-well plates at a density of 2.0 × 10<sup>4</sup> cells/well. After  
24 culture for 24 h, 4T1 cells were incubated with ICG, DHN, ICG-DHN, and  
25 RBCs@ICG-DHN at the equivalent DHN concentration (2, 5, 10, 20, and 40 μg/mL)  
26 with 808 nm laser irradiation (100 mW/cm<sup>2</sup> and 5 min) for 24 h, respectively. Next,  
27 the cell viability was determined by a commercial MTT assay based on the  
28 manufacturer's suggested instruction. Every determination groups had three parallel  
29 samples.

30     **1.15. *In vitro* live/dead cell staining**

31     4T1 cells were seeded in 12-well plates at a density of 5.0 × 10<sup>5</sup> cells/well. After  
32 incubation for 24 h, 4T1 cells were treated with ICG, DHN, ICG-DHN, and  
33 RBCs@ICG-DHN at the equivalent DHN concentration of 20 μg/mL with 808 nm  
34 laser irradiation (100 mW/cm<sup>2</sup> and 5 min) for 16 h, respectively. Finally, the live/dead

1 cell staining was estimated by a calcein-AM/PI staining Kit according to the  
2 manufacturer's suggested protocol and imaged by a Leica DM6000B fluorescence  
3 microscope in USA.

#### 4 **1.16. *In vitro* apoptosis assay**

5 4T1 cells were seeded in 6-well plates at a density of  $2.0 \times 10^5$  cells per well.  
6 After incubation for 24 h, 4T1 cells were incubated with ICG, DHN, ICG-DHN, and  
7 RBCs@ICG-DHN at the equivalent DHN concentration of  $20 \mu\text{g}/\text{mL}$  with 808 nm  
8 laser irradiation ( $100 \text{ mW}/\text{cm}^2$  and 5 min) for 16 h. The cell apoptosis was estimated  
9 by an Annexin V-FITC/PI apoptosis detection Kit based on the manufacturer's  
10 suggested instruction and then the experimental results were further analyzed by  
11 flowjo V10.

#### 12 **1.17. *In vivo* NIR fluorescence self-imaging**

13 4T1 tumor-bearing mice were intravenously injected with  $200 \mu\text{L}$  of ICG, ICG-  
14 DHN, and RBCs@ICG-DHN at the equivalent ICG concentration of  $100 \mu\text{g}/\text{mL}$   
15 through the tail vein. Finally, the NIR fluorescence self-imaging was collected on an  
16 IVIS Lumina imaging system in USA at 0, 3, 6, 9, 12, and 24 h post-injection. Every  
17 determination groups had three mice.

#### 18 **1.18. *In vivo* synergistic therapy**

19 When the tumor volume reached  $80 \text{ mm}^3$ , mice were divided into 8 groups ( $n =$   
20 6): PBS group as a control, ICG group, ICG/laser group, DHN group, ICG-DHN  
21 group, ICG-DHN/laser group, RBCs@ICG-DHN group, and RBCs@ICG-DHN/laser  
22 group. After the intravenous injection through the tail vein for 24 h, the tumor regions  
23 of mice were exposed to the 808 nm laser irradiation ( $100 \text{ mW}/\text{cm}^2$  and 5 min). After  
24 that, the tumor volume and body weight were recorded every 2 d for weeks. The  
25 tumor size was determined by a vernier caliper. Next, the tumor volume (V) was  
26 calculated as  $V = \text{length} \times \text{width}^2/2$ .

27 Next, after observation for 14 d, the 4T1 tumor-bearing mice were euthanized,  
28 the main organs and tumors were dissected to conduct hematoxylin and eosin (H&E)  
29 staining according to our previous method<sup>2</sup>. In addition, the tumor tissues were also  
30 employed to perform DCFH-DA and Ki 67 staining based on our previous method<sup>3</sup>.

#### 31 **1.19. Statistical analysis**

32 All data were expressed as means  $\pm$  standard deviation (SD). Statistical  
33 differences among groups are analyzed by using one-way ANOVA analysis, followed  
34 by Tukey's post-test.  $P < 0.05$  was considered to be statistically significant with

1 notation by \* (\*\* and \*\*\* indicate  $P < 0.01$  and  $P < 0.001$ , respectively).

## 2 2. References

- 3 1. Y. Chen, Y. Li, J. Liu, Q. Zhu, J. Ma and X. Zhu, *J. Controlled Release*, 2021, **335**, 345-358.
- 4 2. Z. Fan, B. Jiang, Q. Zhu, S. Xiang, L. Tu, Y. Yang, Q. Zhao, D. Huang, J. Han, G. Su, D. Ge  
5 and Z. Hou, *ACS Applied Materials & Interfaces*, 2020, **12**, 14884-14904.
- 6 3. Z. Fan, D. Shi, W. Zuo, J. Feng, D. Ge, G. Su, L. Yang and Z. Hou, *ACS Applied Materials &*  
7 *Interfaces*, 2022, **14**, 5033-5052.

## 8 3. Supplementary data

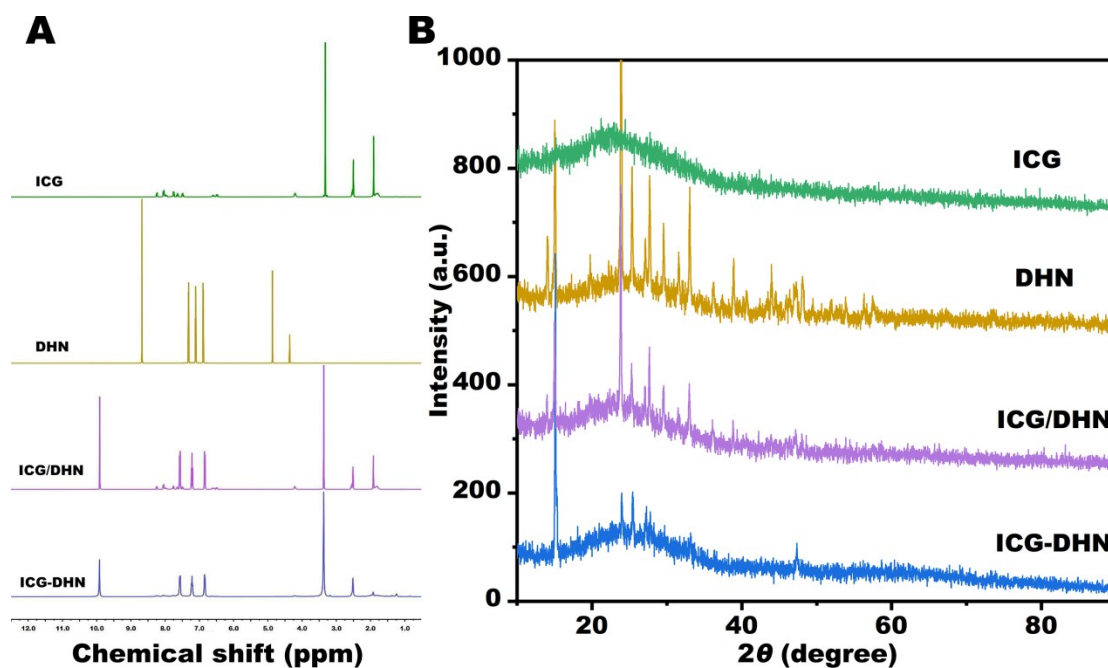

9  
10 **Figure S1.** (A) <sup>1</sup>H NMR and (B) XRD spectra of ICG, DHN, ICG/DHN mixture, and  
11 ICG-DHN.

12



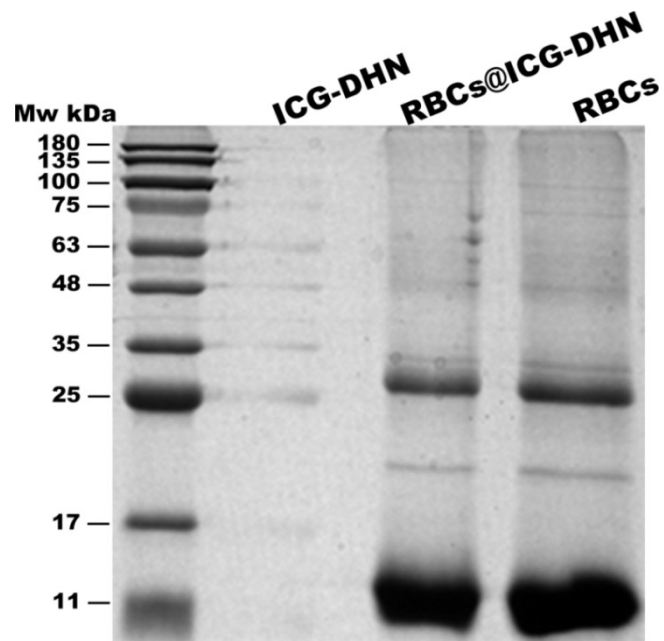

1

2 **Figure S2.** SDS-PAGE analysis of ICG-DHN, RBCs@ICG-DHN, and RBCs.

3

4

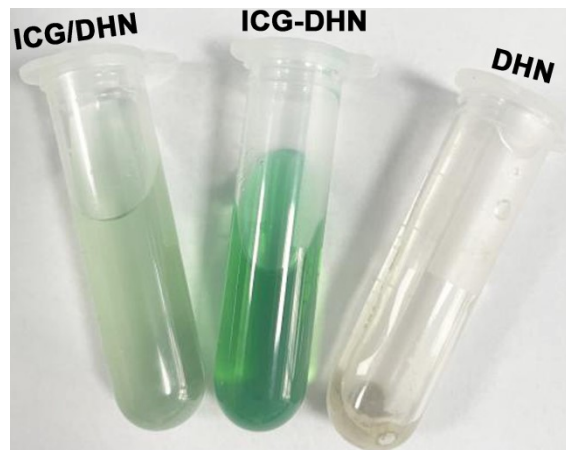

5

6 **Figure S3.** Optical images of ICG/DHN, ICG-DHN, and DHN dissolved in PBS for

7 24 h.

8

9

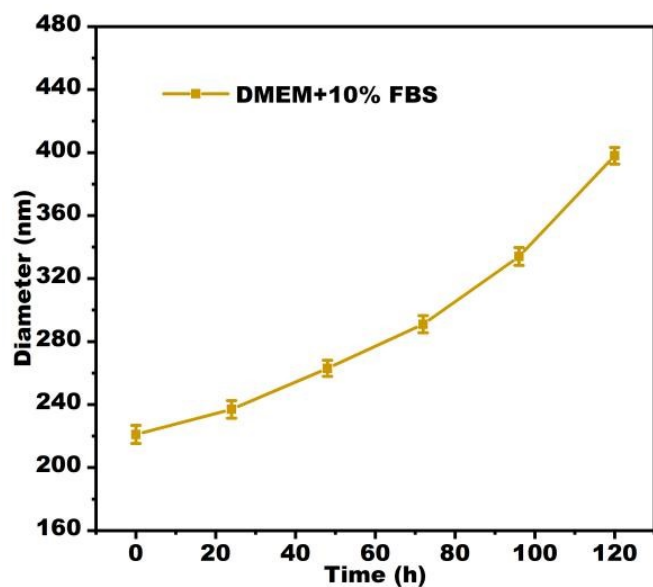

1

2 **Figure S4.** Change in the hydrodynamic diameter of ICG-DHN in DMEM containing  
 3 10% FBS for 120 h. Data are presented as the means  $\pm$  SD ( $n = 3$ ).

4

5

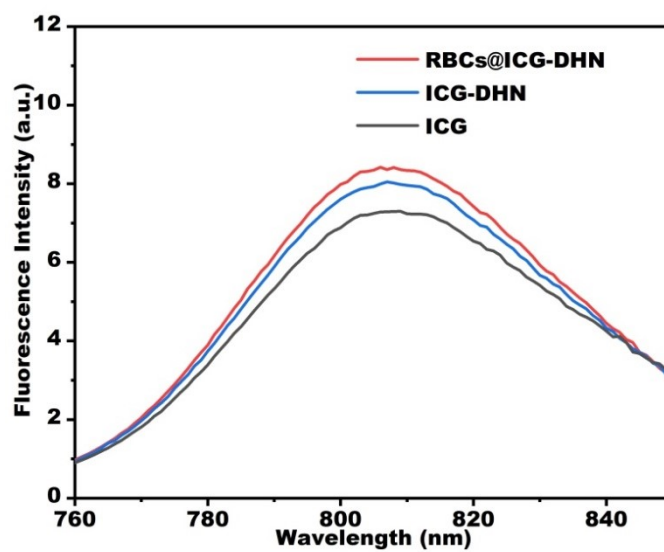

6

7 **Figure S5.** Fluorescence spectra of ICG, ICG-DHN, and RBCs@ICG-DHN with the  
 8 same ICG concentration in aqueous solution for 120 h.

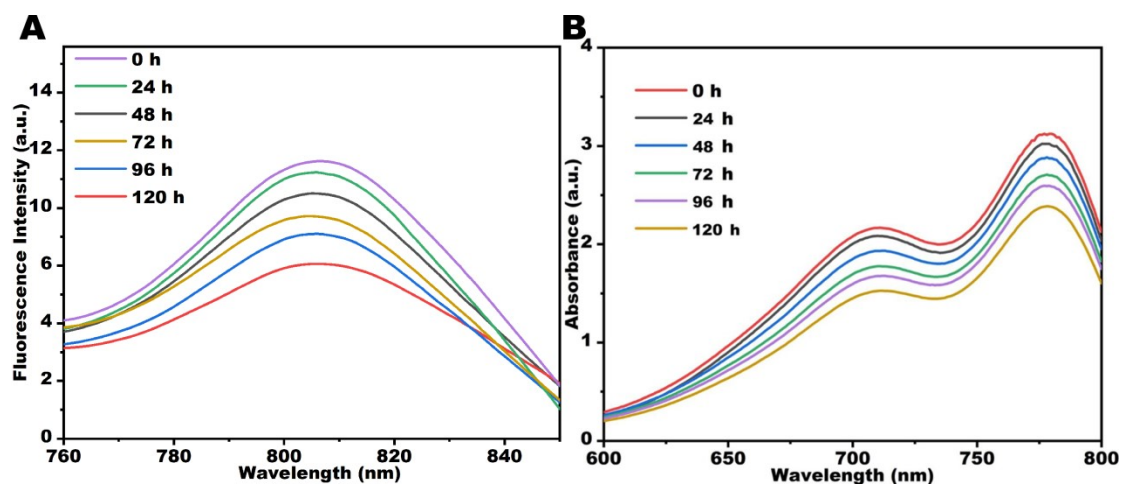

1

2 **Figure S6.** (A) Fluorescence and (B) UV-vis absorption spectra of ICG-DHN in  
 3 aqueous solution for 120 h.

4

5

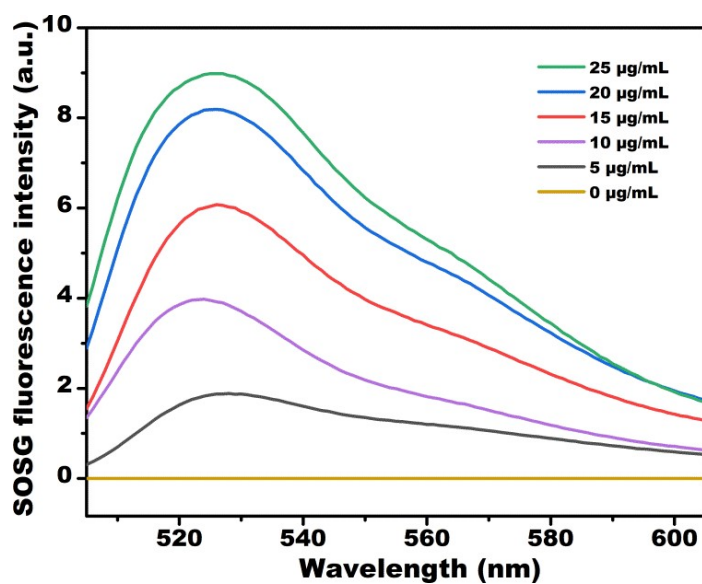

6

7 **Figure S7.** Fluorescence intensity of SOSG generated by RBCs@ICG-DHN at  
 8 different ICG concentrations under 808 nm laser irradiation ( $100 \text{ mW/cm}^2$ ) for 5 min.

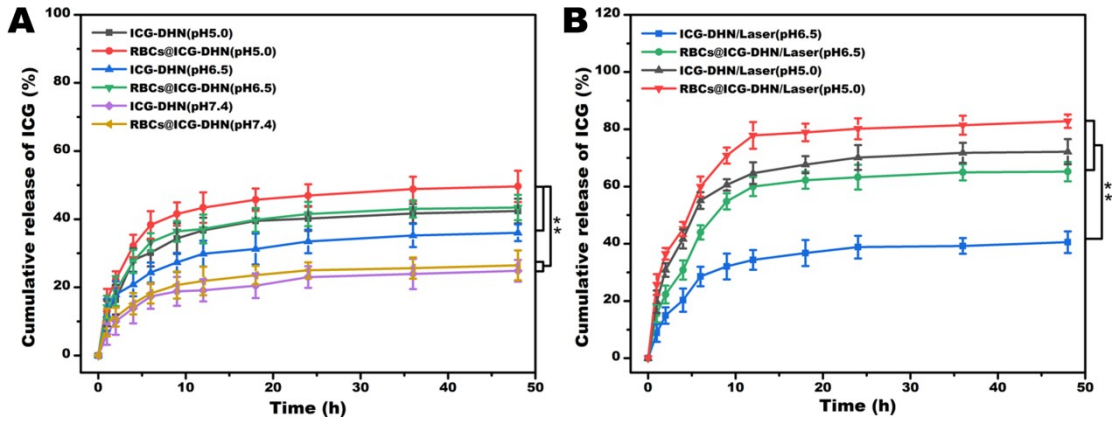

1  
 2 **Figure S8.** (A) Cumulative release of ICG from ICG-DHN and RBCs@ICG-DHN at  
 3 pH 7.4, 6.5, and 5.0. (B) Cumulative release of ICG from ICG-DHN and  
 4 RBCs@ICG-DHN at pH 6.5 and 5.0 with 808 nm laser irradiation (100 mW/cm<sup>2</sup>) for  
 5 5 min. Data are presented as the means  $\pm$  SD ( $n = 3$ ) and  $**P < 0.01$ .

6  
 7

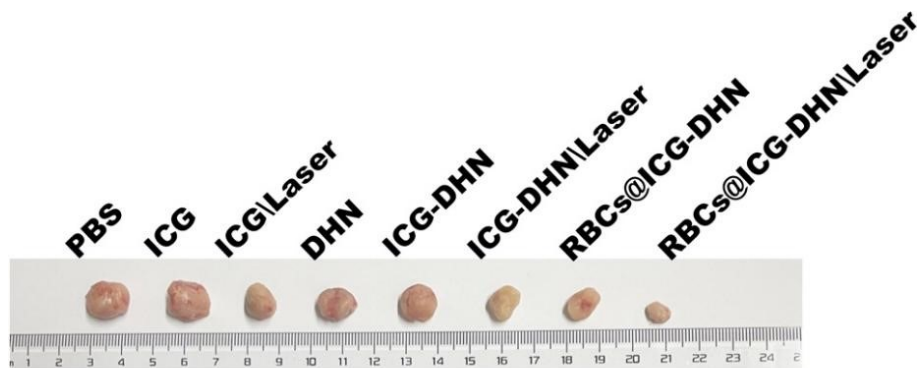

8  
 9 **Figure S9.** Photographs of representative tumor tissues after different therapies.

10  
 11

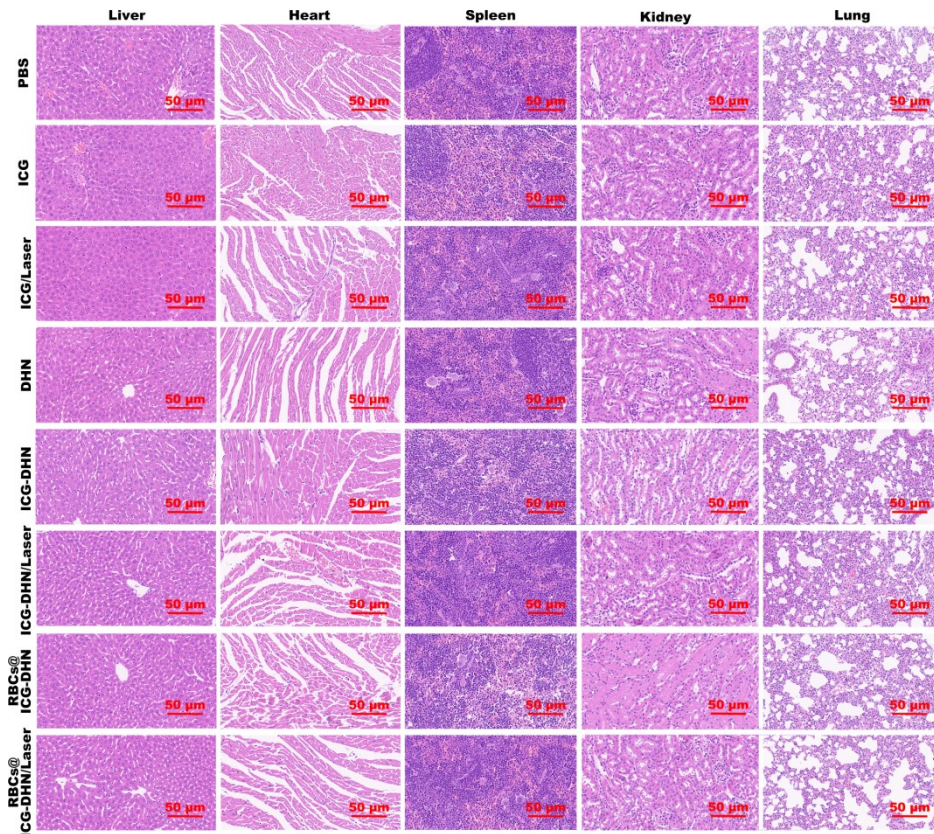

1  
 2 **Figure S10.** H&E stained images of normal tissues (heart, liver, spleen, lung, and  
 3 kidney) after different therapies.

4  
 5

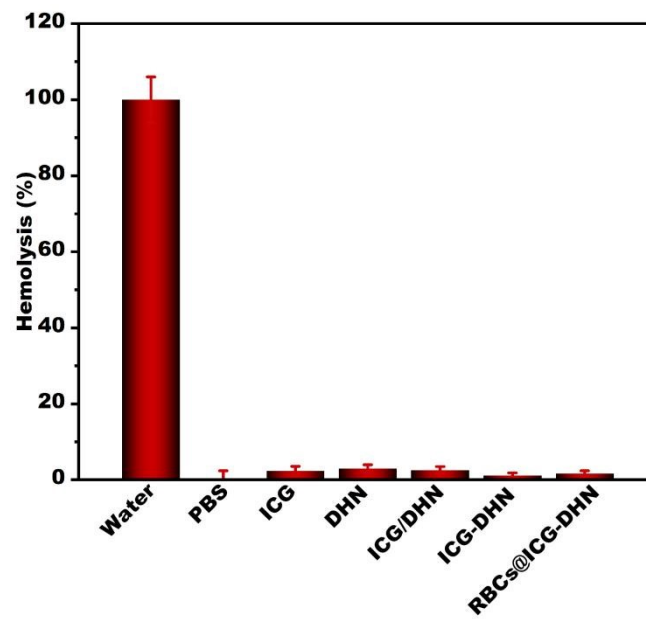

6  
 7 **Figure S11.** Hemolysis rate of water, PBS (pH 7.4), ICG, DHN, ICG/DHN mixture,  
 8 ICG-DHN, and RBCs@ICG-DHN. Data are presented as the means  $\pm$  SD ( $n = 3$ ).
